# Supplementary material
Source: publisher site journal article supplement (https://www.dovepress.com/article/213432)
Supplement: Supplementary file 1 [file get_supplementary_file.php]

**
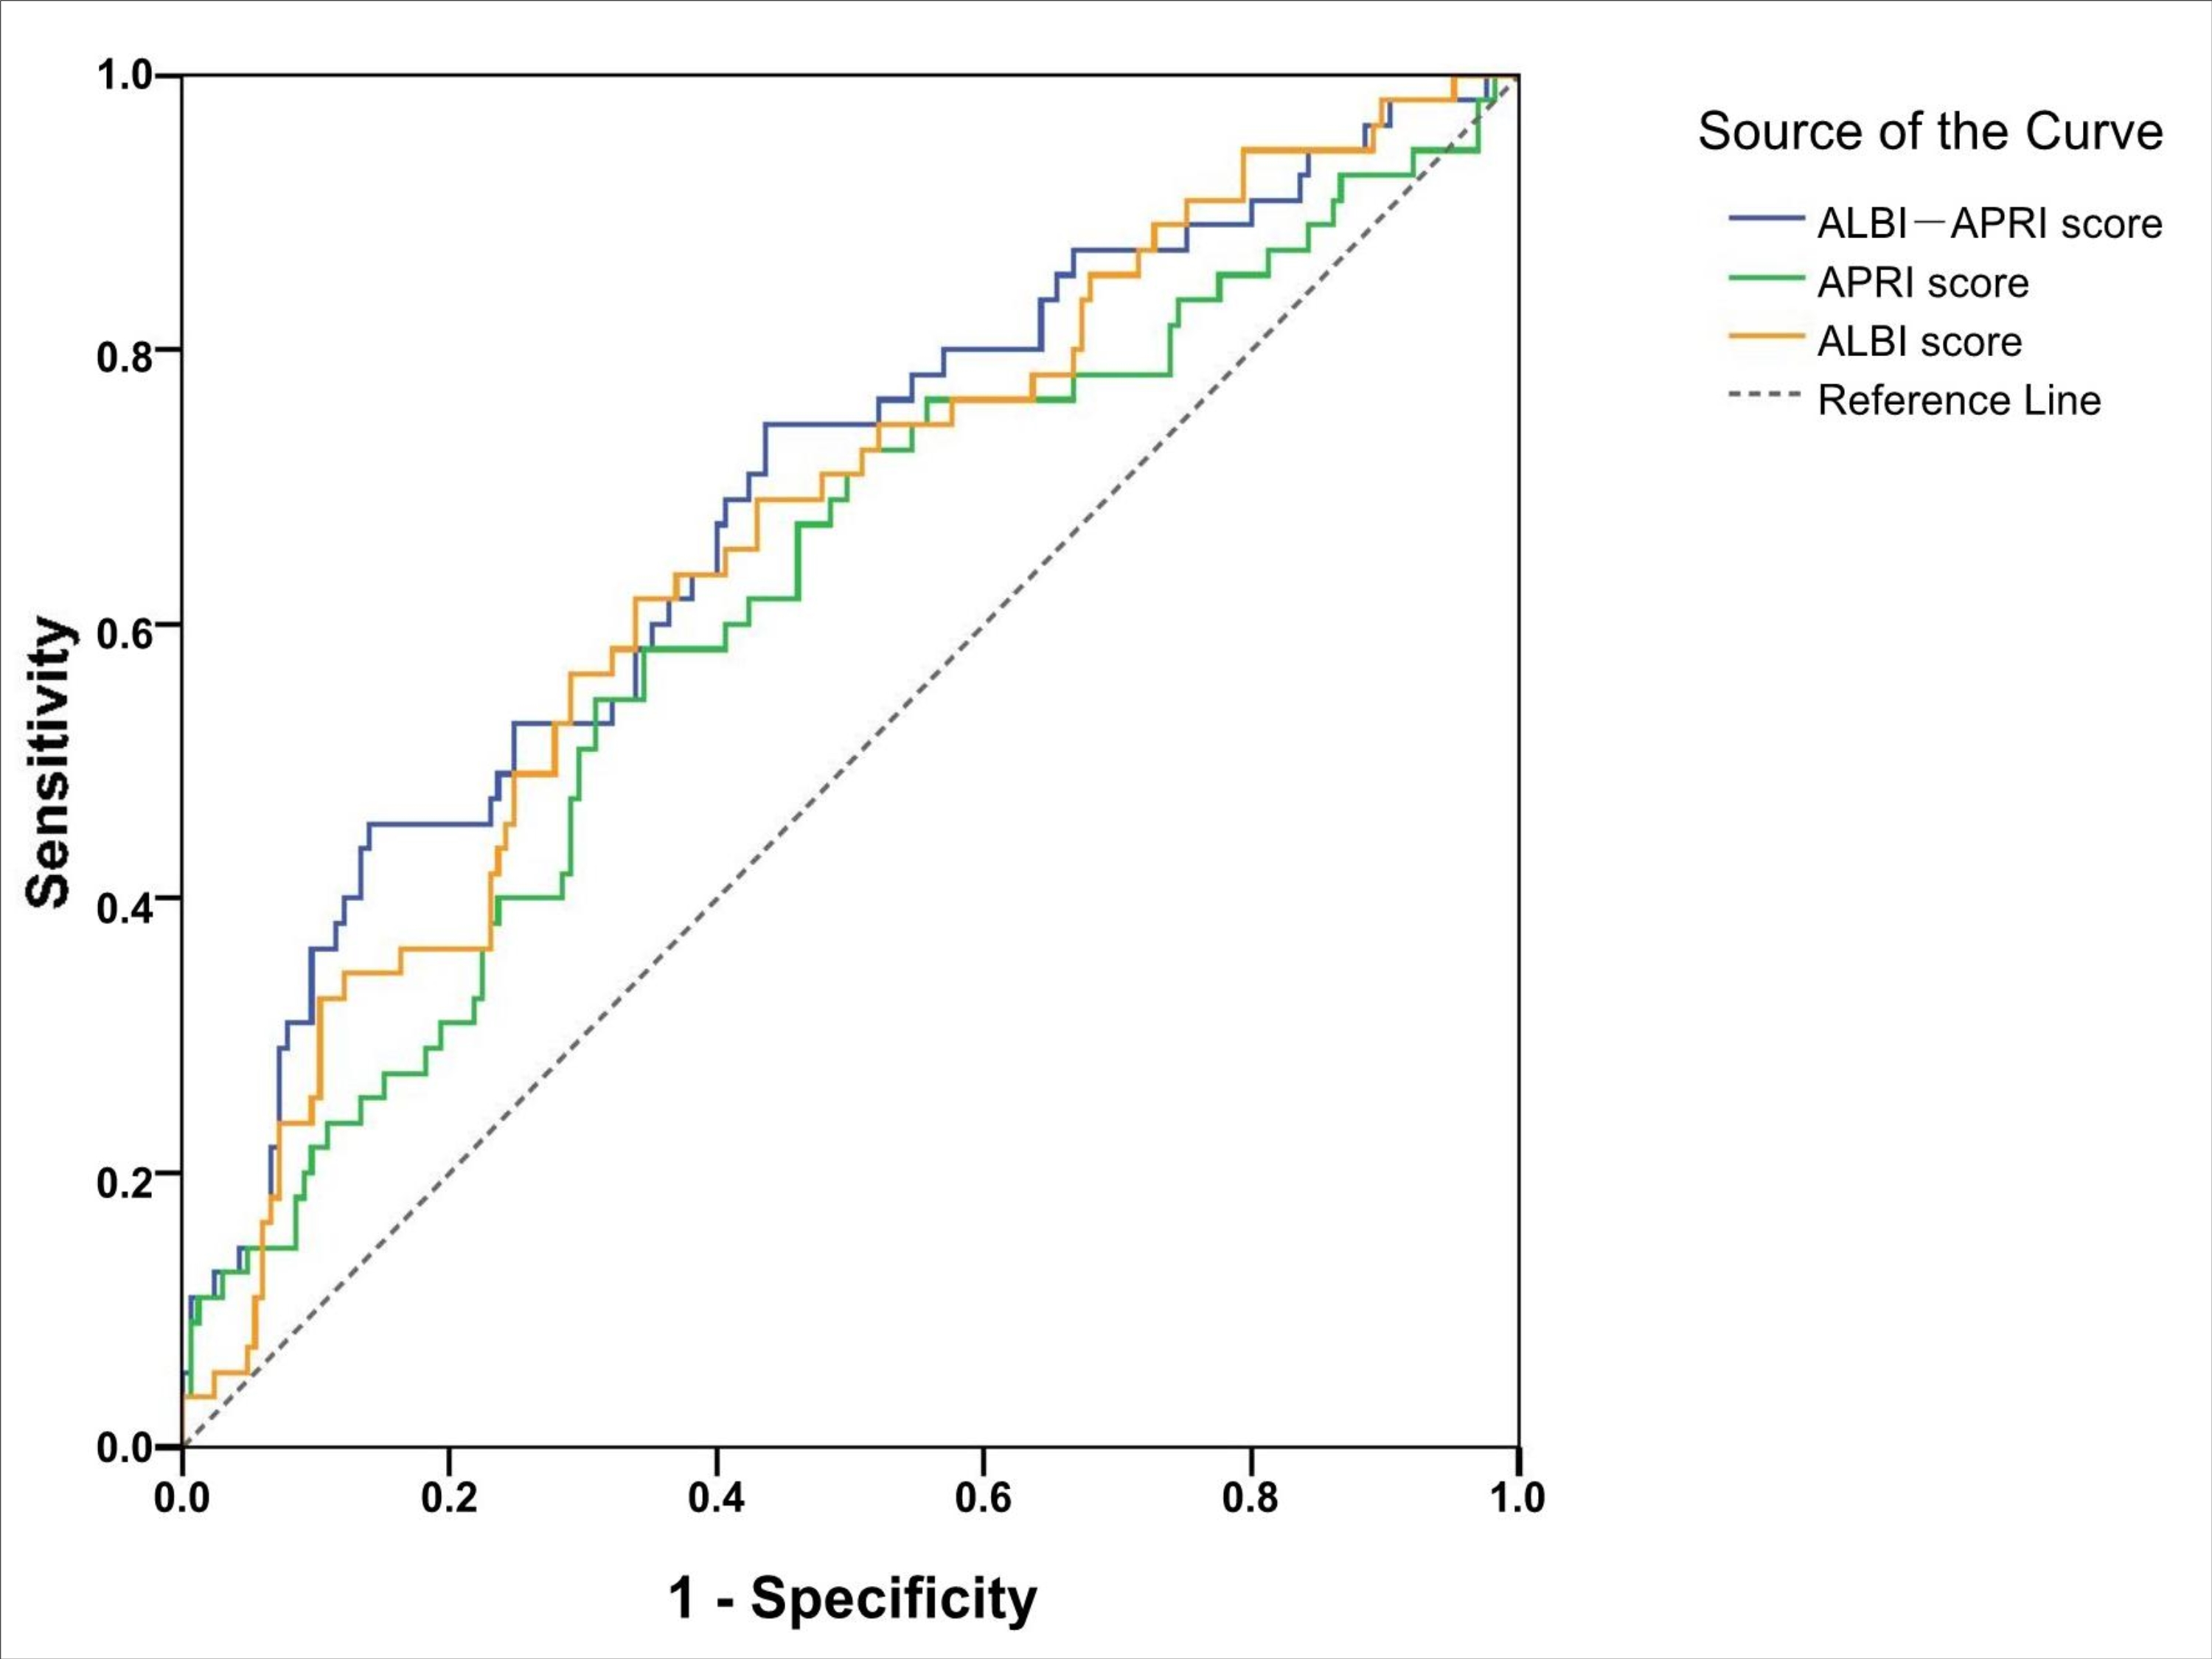
Figure supplement:** ROC curves for ALBI, APRI, and ALBI-APRI scores for predicting PHLF for subjects who underwent major resection.

Abbreviations: PHLF, posthepatectomy liver failure; ALBI, albumin - bilirubin; APRI, aminotransferase - platelet ratio index; ALBI-APRI, combination of ALBI and APRI.
